# Supplementary material for: Spatial patterns of bacterial and archaeal communities along the Romanche Fracture Zone (tropical Atlantic)
Source: PubMed Central journal article supplement (PMC3840699; doi:10.1111/1574-6941.12142), 2013-05-16
Supplement: fem0085-0537-sd1.pdf [file fem0085-0537-sd1.pdf]

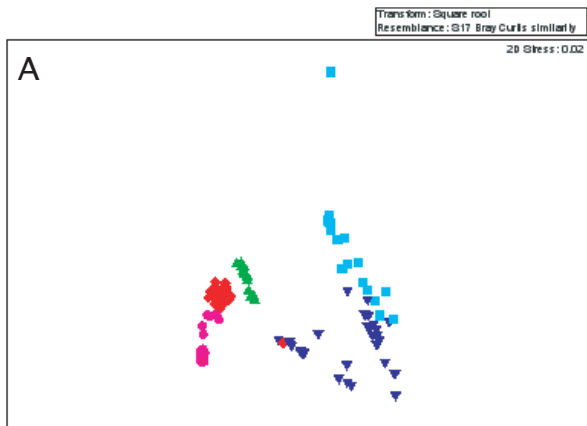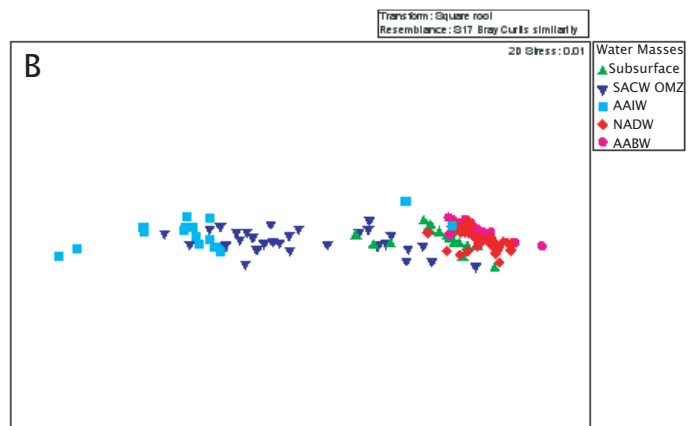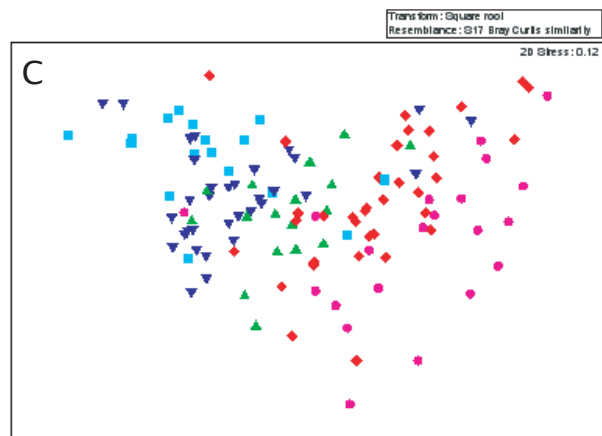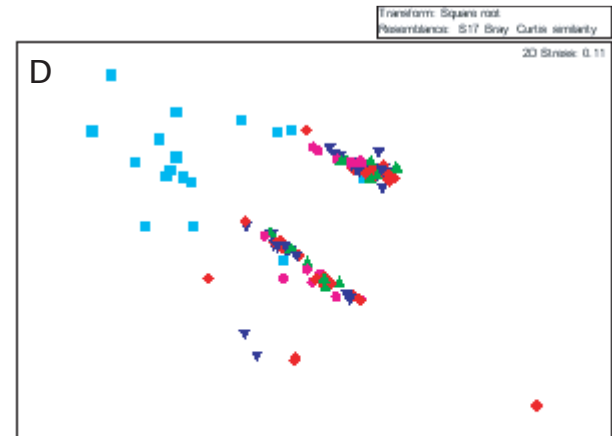

Sup.Fig.1
